# Supplementary material for: JNKi- and DAC-programmed mesenchymal stem/stromal cells from hESCs facilitate hematopoiesis and alleviate hind limb ischemia
Source: PubMed Central journal article supplement (PMC6591900; doi:10.1186/s13287-019-1302-1), 2019-06-24

**a**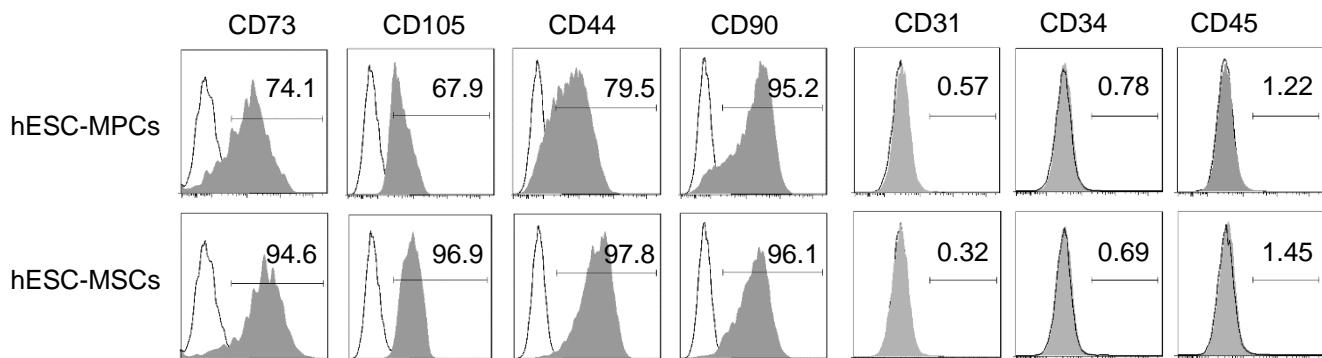**b**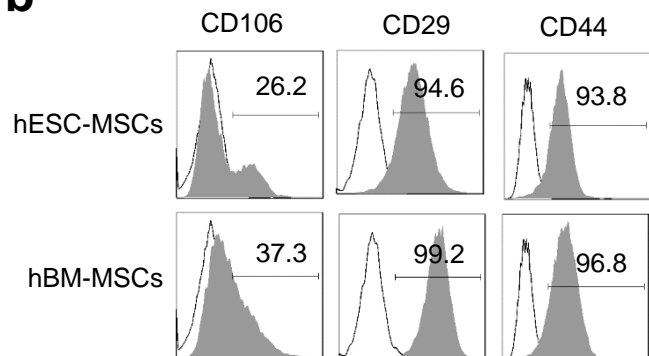**c**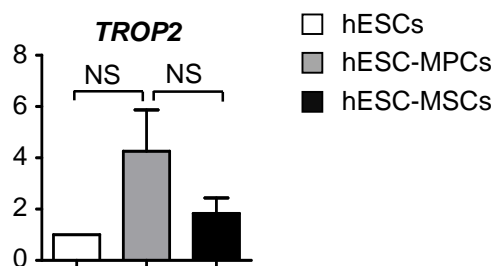**d**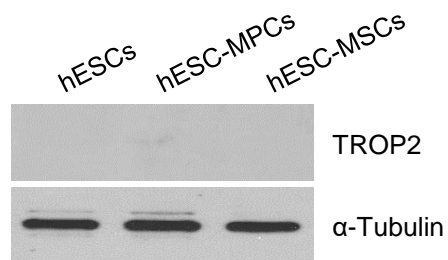**e**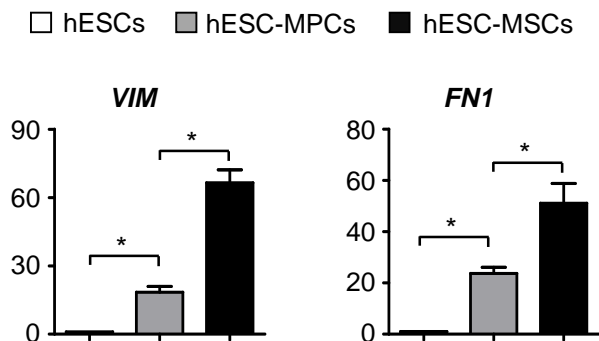**f**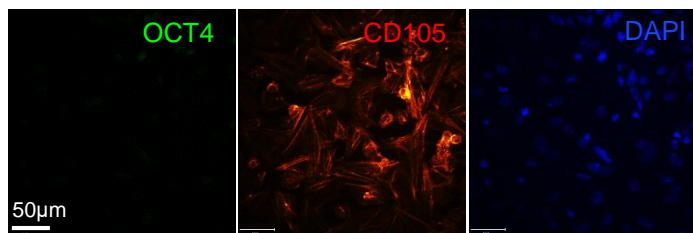

Supplement: 13287_2019_1302_MOESM2_ESM.pdf [file 13287_2019_1302_MOESM2_ESM.pdf]
